# Supplementary material
Source: publisher figshare collection journal article supplement (https://acs.figshare.com/ndownloader/files/3731662)
Supplement: Supplementary file 1 [file 3731662]

## Supporting Information

# Temperature and pH Responsive Benzoboroxole based Polymers for Flocculation and Enhanced Dewatering of Fine Particle Suspensions

*Han Lu,<sup>1</sup> Yinan Wang,<sup>1</sup> Lin Li,<sup>1</sup> Yohei Kotsuchibashi,<sup>2</sup> Ravin Narain,<sup>1\*</sup> Hongbo Zeng<sup>1\*</sup>*

<sup>1</sup>Department of Chemical and Materials Engineering, University of Alberta, 116 St and 85 Ave,  
Edmonton, AB T6G 2G6, Canada

<sup>2</sup>International Center for Young Scientists (ICYS), National Institute for Materials Science  
(NIMS), 1-1 Namiki, Tsukuba, Japan

Ravin Narain: [narain@ualberta.ca](mailto:narain@ualberta.ca)

Hongbo Zeng: [hongbo.zeng@ualberta.ca](mailto:hongbo.zeng@ualberta.ca)

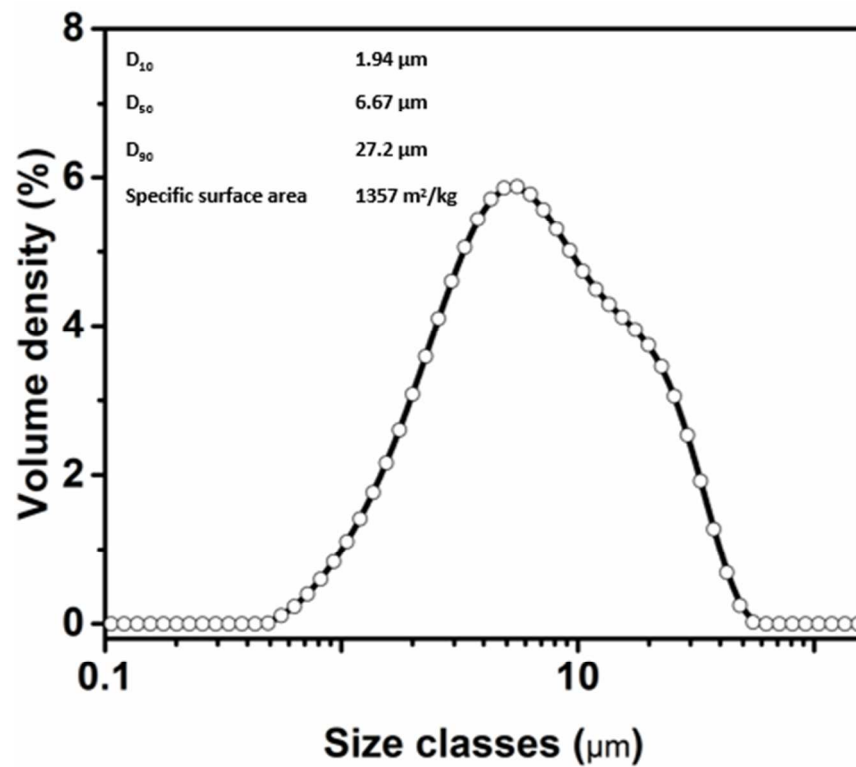

Figure S1. Particle size distribution and specific surface area of kaolin particles.

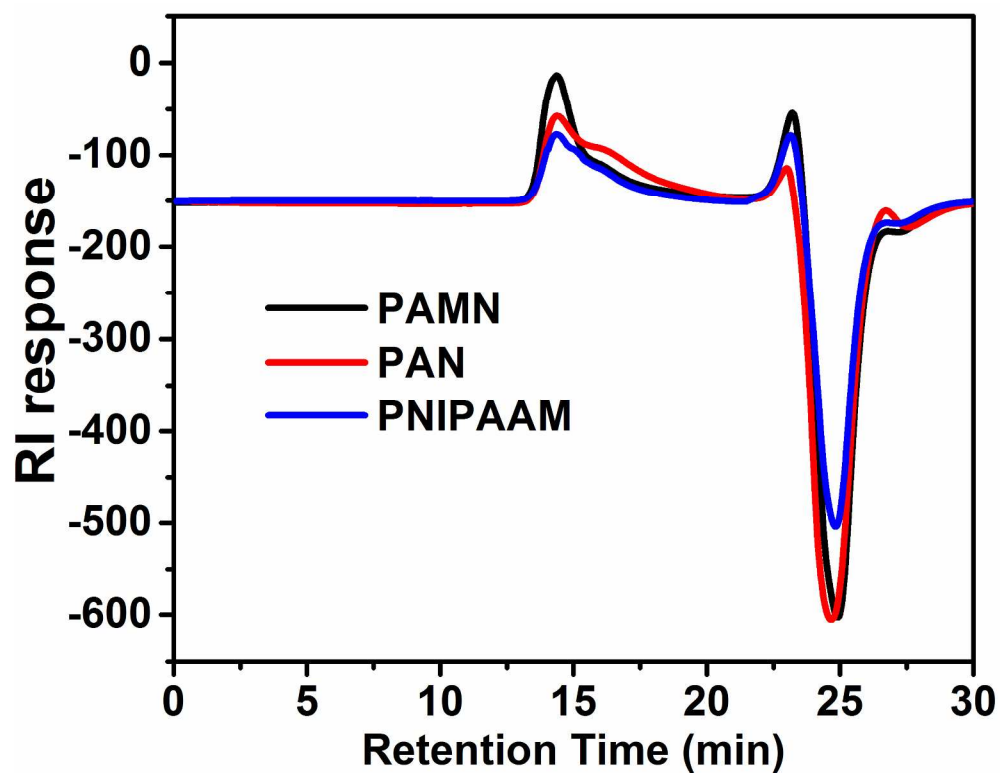

Figure S2. Gel permeation chromatography (GPC) plot of ■ PAMN, ● PAN, ▲ PNIPAAm.

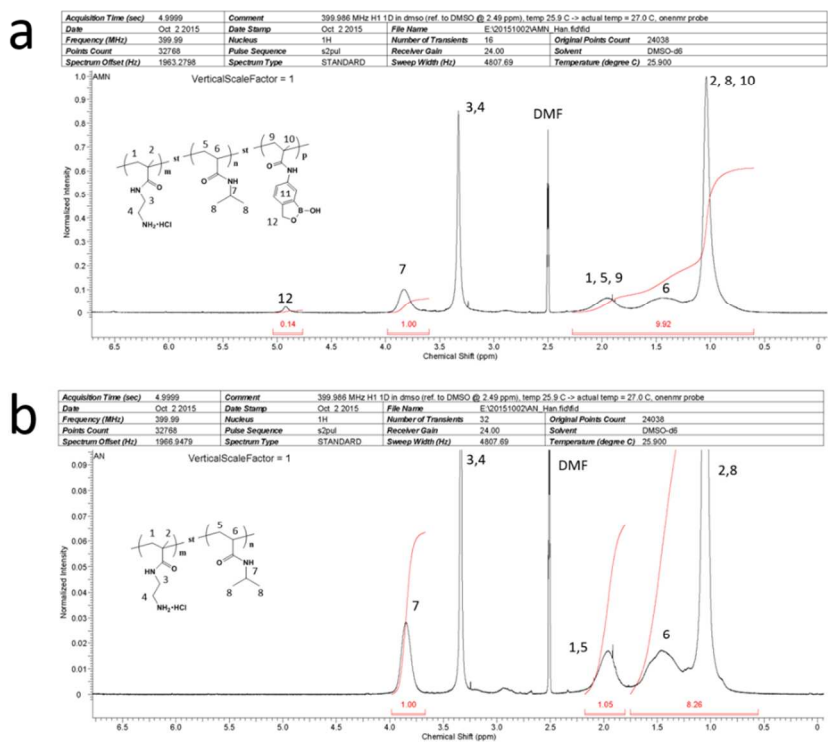

Figure S3. (a)  $^1\text{H}$  NMR spectra for PAMN, and (b)  $^1\text{H}$  NMR spectra for PAN.

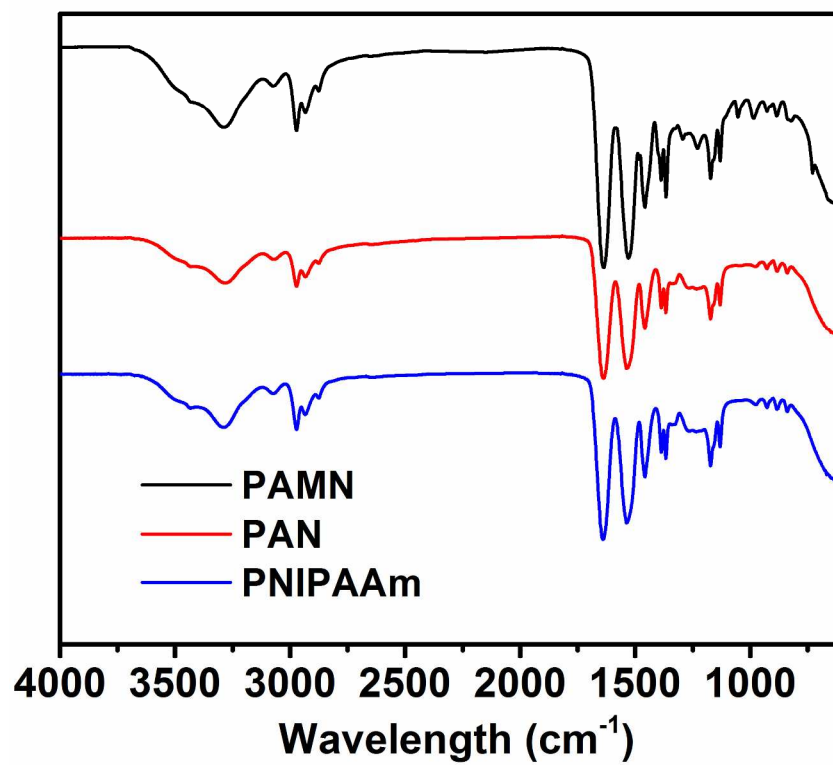

Figure S4. FTIR spectra of — PAMN, — PAN, — PNIPAAm samples over the wavelength ranging from 4000 – 600 cm<sup>-1</sup>.
